# Supplementary material for: Endangered Exotic Pets on Social Media in the Middle East: Presence and Impact
Source: PubMed Central journal article supplement (PMC6720740; doi:10.3390/ani9080480), 2019-07-24
Supplement: animals-09-00480-s001.pdf [file animals-09-00480-s001.pdf]

Table S1. Complete list of emojis included in comment compilation from celebrity social media posts based in the Middle East featuring assessed exotic animal species (Arabian oryx, giraffe, falcon, elephant, cheetah, orangutan, chimpanzee, tiger, and zebra).

| Description                                 | n    | Expansive category | Condensed category |
|---------------------------------------------|------|--------------------|--------------------|
| red heart                                   | 1847 | love               | positive           |
| face with tears of joy                      | 1664 | happy              | positive           |
| smiling face with heart-eyes                | 1488 | love               | positive           |
| two hearts                                  | 947  | love               | positive           |
| rose                                        | 538  | miscellaneous      | neutral            |
| face blowing a kiss                         | 445  | love               | positive           |
| thumbs up                                   | 445  | happy              | positive           |
| clapping hands                              | 417  | happy              | positive           |
| sparkling heart                             | 337  | love               | positive           |
| revolving hearts                            | 302  | love               | positive           |
| smiling face with smiling eyes              | 296  | happy              | positive           |
| tulip                                       | 294  | miscellaneous      | neutral            |
| folded hands                                | 289  | miscellaneous      | neutral            |
| blue heart                                  | 274  | love               | positive           |
| heart suit                                  | 264  | love               | positive           |
| smiling face                                | 231  | happy              | positive           |
| ok hand                                     | 226  | happy              | positive           |
| hugging face                                | 214  | love               | positive           |
| see-no-evil monkey                          | 195  | shock              | neutral            |
| growing heart                               | 191  | love               | positive           |
| kiss mark                                   | 181  | love               | positive           |
| rolling on the floor laughing               | 177  | happy              | positive           |
| winking face                                | 150  | happy              | positive           |
| loudly crying face                          | 133  | happy              | positive           |
| crown                                       | 128  | miscellaneous      | neutral            |
| mouth                                       | 121  | love               | positive           |
| smiling face with open mouth & cold sweat   | 117  | shock              | neutral            |
| grinning face with smiling eyes             | 110  | happy              | positive           |
| cherry blossom                              | 108  | miscellaneous      | neutral            |
| smiling face with open mouth & smiling eyes | 104  | happy              | positive           |
| smiling face with halo                      | 101  | happy              | positive           |
| hot beverage                                | 100  | miscellaneous      | neutral            |
| yellow heart                                | 99   | love               | positive           |
| dove                                        | 94   | animal             | neutral            |

|                                            |    |                   |          |
|--------------------------------------------|----|-------------------|----------|
| broken heart                               | 92 | sad               | negative |
| kissing face with smiling eyes             | 92 | love              | positive |
| balloon                                    | 91 | miscellaneous     | neutral  |
| hibiscus                                   | 91 | miscellaneous     | neutral  |
| beating heart                              | 90 | love              | positive |
| heart decoration                           | 85 | love              | positive |
| kissing face with closed eyes              | 83 | love              | positive |
| unamused face                              | 83 | anger             | negative |
| flexed biceps                              | 79 | miscellaneous     | neutral  |
| wilted flower                              | 73 | miscellaneous     | negative |
| lion face                                  | 72 | animal            | neutral  |
| purple heart                               | 71 | love              | positive |
| sparkles                                   | 71 | miscellaneous     | neutral  |
| face with stuck-out tongue & winking eye   | 68 | happy             | positive |
| heart with ribbon                          | 67 | love              | positive |
| thought balloon                            | 66 | miscellaneous     | neutral  |
| victory hand                               | 65 | miscellaneous     | neutral  |
| face screaming in fear                     | 64 | anger             | negative |
| leaf fluttering in wind                    | 63 | miscellaneous     | neutral  |
| grinning face                              | 62 | happy             | positive |
| musical notes                              | 62 | miscellaneous     | neutral  |
| green heart                                | 61 | love              | positive |
| pensive face                               | 61 | anger             | negative |
| speak-no-evil monkey                       | 61 | miscellaneous     | negative |
| smiling face with open mouth & closed eyes | 56 | happy             | positive |
| sleeping face                              | 55 | miscellaneous     | negative |
| united arab emirates                       | 55 | geographic region | neutral  |
| face savouring delicious food              | 54 | happy             | positive |
| female sign                                | 52 | miscellaneous     | neutral  |
| flushed face                               | 52 | happy             | positive |
| raising hands                              | 52 | miscellaneous     | neutral  |
| sun                                        | 51 | miscellaneous     | neutral  |
| couple with heart                          | 50 | love              | positive |
| glowing star                               | 50 | miscellaneous     | neutral  |
| deciduous tree                             | 49 | miscellaneous     | neutral  |
| face with open mouth & cold sweat          | 49 | anger             | negative |
| waving hand                                | 47 | miscellaneous     | neutral  |
| sun with face                              | 45 | miscellaneous     | neutral  |

|                                  |    |               |          |
|----------------------------------|----|---------------|----------|
| cloud                            | 44 | miscellaneous | neutral  |
| eyes                             | 44 | miscellaneous | neutral  |
| smiling cat face with heart-eyes | 43 | love          | positive |
| bouquet                          | 41 | miscellaneous | neutral  |
| crying cat face                  | 40 | sad           | negative |
| smiling face with open mouth     | 40 | happy         | positive |
| crying face                      | 39 | sad           | negative |
| maple leaf                       | 39 | miscellaneous | neutral  |
| relieved face                    | 39 | happy         | positive |
| hushed face                      | 36 | shock         | neutral  |
| face with stuck-out tongue       | 34 | happy         | positive |
| thinking face                    | 34 | anger         | negative |
| backhand index pointing right    | 33 | miscellaneous | neutral  |
| eagle                            | 32 | animal        | neutral  |
| elephant                         | 32 | animal        | neutral  |
| face with rolling eyes           | 32 | anger         | negative |
| cat face with tears of joy       | 31 | happy         | positive |
| love letter                      | 31 | miscellaneous | neutral  |
| musical score                    | 31 | miscellaneous | neutral  |
| party popper                     | 31 | miscellaneous | neutral  |
| blossom                          | 30 | miscellaneous | neutral  |
| heart with arrow                 | 30 | love          | positive |
| milky way                        | 30 | miscellaneous | neutral  |
| horse                            | 29 | animal        | neutral  |
| person biking                    | 29 | miscellaneous | neutral  |
| slightly smiling face            | 29 | happy         | positive |
| camel                            | 26 | animal        | neutral  |
| disappointed face                | 26 | sad           | negative |
| girl                             | 25 | miscellaneous | neutral  |
| person getting massage           | 25 | miscellaneous | neutral  |
| weary face                       | 25 | anger         | negative |
| male sign                        | 24 | miscellaneous | neutral  |
| white medium star                | 23 | miscellaneous | neutral  |
| boy                              | 22 | miscellaneous | neutral  |
| camera                           | 22 | miscellaneous | neutral  |
| christmas tree                   | 22 | miscellaneous | neutral  |
| person running                   | 22 | miscellaneous | neutral  |
| black heart                      | 21 | love          | negative |
| confused face                    | 21 | sad           | negative |
| evergreen tree                   | 21 | miscellaneous | neutral  |
| grimacing face                   | 21 | anger         | negative |

|                                          |    |                   |          |
|------------------------------------------|----|-------------------|----------|
| musical note                             | 21 | miscellaneous     | neutral  |
| oncoming fist                            | 21 | miscellaneous     | negative |
| face with open mouth                     | 20 | shock             | neutral  |
| fire                                     | 20 | miscellaneous     | neutral  |
| man                                      | 20 | miscellaneous     | neutral  |
| person gesturing ok                      | 20 | miscellaneous     | positive |
| person shrugging                         | 20 | miscellaneous     | negative |
| red circle                               | 20 | miscellaneous     | negative |
| wind face                                | 20 | miscellaneous     | neutral  |
| zzz                                      | 20 | miscellaneous     | negative |
| first quarter moon with face             | 19 | miscellaneous     | neutral  |
| person wearing turban                    | 19 | miscellaneous     | neutral  |
| sparkler                                 | 19 | miscellaneous     | neutral  |
| sunflower                                | 19 | miscellaneous     | neutral  |
| trophy                                   | 19 | miscellaneous     | neutral  |
| anguished face                           | 18 | anger             | negative |
| fearful face                             | 18 | sad               | negative |
| monkey                                   | 18 | animal            | neutral  |
| rainbow                                  | 18 | miscellaneous     | neutral  |
| blond-haired person                      | 17 | miscellaneous     | neutral  |
| ceuta & melilla                          | 17 | geographic region | neutral  |
| four leaf clover                         | 17 | miscellaneous     | neutral  |
| kiss                                     | 17 | love              | positive |
| kissing face                             | 17 | love              | positive |
| top arrow                                | 17 | miscellaneous     | neutral  |
| water wave                               | 17 | miscellaneous     | neutral  |
| astonished face                          | 16 | shock             | negative |
| azerbaijan                               | 16 | geographic region | neutral  |
| backhand index pointing up               | 16 | miscellaneous     | neutral  |
| crescent moon                            | 16 | miscellaneous     | neutral  |
| face with stuck-out tongue & closed eyes | 16 | happy             | positive |
| globe showing asia-australia             | 16 | miscellaneous     | neutral  |
| heavy heart exclamation                  | 16 | love              | positive |
| megaphone                                | 16 | miscellaneous     | neutral  |
| person facepalming                       | 16 | anger             | negative |
| smiling face with sunglasses             | 16 | happy             | positive |
| confounded face                          | 15 | anger             | negative |
| ghost                                    | 15 | miscellaneous     | neutral  |

|                              |    |                   |          |
|------------------------------|----|-------------------|----------|
| herb                         | 15 | miscellaneous     | neutral  |
| honey pot                    | 15 | miscellaneous     | neutral  |
| night with stars             | 15 | miscellaneous     | neutral  |
| open hands                   | 15 | miscellaneous     | neutral  |
| palm tree                    | 15 | miscellaneous     | neutral  |
| umbrella with rain drops     | 15 | miscellaneous     | neutral  |
| deer                         | 14 | animal            | neutral  |
| expressionless face          | 14 | shock             | negative |
| fog                          | 14 | miscellaneous     | neutral  |
| green salad                  | 14 | miscellaneous     | neutral  |
| hundred points               | 14 | miscellaneous     | positive |
| person raising hand          | 14 | miscellaneous     | neutral  |
| red apple                    | 14 | miscellaneous     | neutral  |
| backhand index pointing left | 13 | miscellaneous     | neutral  |
| camera with flash            | 13 | miscellaneous     | neutral  |
| cherries                     | 13 | miscellaneous     | neutral  |
| dizzy                        | 13 | miscellaneous     | neutral  |
| face with steam from nose    | 13 | anger             | negative |
| leopard                      | 13 | animal            | neutral  |
| raised hand                  | 13 | miscellaneous     | neutral  |
| shooting star                | 13 | miscellaneous     | neutral  |
| south africa                 | 13 | geographic region | neutral  |
| baby angel                   | 12 | miscellaneous     | neutral  |
| confetti ball                | 12 | miscellaneous     | positive |
| dizzy face                   | 12 | shock             | negative |
| globe showing europe-africa  | 12 | miscellaneous     | neutral  |
| index pointing up            | 12 | miscellaneous     | neutral  |
| smirking face                | 12 | happy             | positive |
| butterfly                    | 11 | animal            | neutral  |
| cloud with rain              | 11 | miscellaneous     | negative |
| fireworks                    | 11 | miscellaneous     | neutral  |
| full moon with face          | 11 | miscellaneous     | neutral  |
| gem stone                    | 11 | miscellaneous     | neutral  |
| memo                         | 11 | miscellaneous     | neutral  |
| sunrise over mountains       | 11 | miscellaneous     | neutral  |
| upside-down face             | 11 | anger             | negative |
| blowfish                     | 10 | animal            | neutral  |
| candy                        | 10 | miscellaneous     | neutral  |
| chocolate bar                | 10 | miscellaneous     | neutral  |
| face without mouth           | 10 | anger             | negative |

|                                  |    |                   |          |
|----------------------------------|----|-------------------|----------|
| fleur-de-lis                     | 10 | miscellaneous     | neutral  |
| frowning face with open mouth    | 10 | anger             | negative |
| honeybee                         | 10 | animal            | neutral  |
| owl                              | 10 | animal            | neutral  |
| paw prints                       | 10 | animal            | neutral  |
| persevering face                 | 10 | anger             | negative |
| person swimming                  | 10 | miscellaneous     | neutral  |
| sheaf of rice                    | 10 | miscellaneous     | neutral  |
| turtle                           | 10 | animal            | neutral  |
| wrapped gift                     | 10 | miscellaneous     | neutral  |
| angry face                       | 9  | anger             | negative |
| argentina                        | 9  | geographic region | neutral  |
| baby                             | 9  | miscellaneous     | neutral  |
| birthday cake                    | 9  | miscellaneous     | neutral  |
| ogre                             | 9  | anger             | negative |
| prohibited                       | 9  | miscellaneous     | negative |
| soccer ball                      | 9  | miscellaneous     | neutral  |
| sports medal                     | 9  | miscellaneous     | neutral  |
| cityscape                        | 8  | miscellaneous     | neutral  |
| drooling face                    | 8  | happy             | positive |
| globe showing americas           | 8  | miscellaneous     | neutral  |
| person bowing                    | 8  | miscellaneous     | neutral  |
| person gesturing no              | 8  | anger             | negative |
| smiling cat face with open mouth | 8  | happy             | positive |
| snake                            | 8  | animal            | neutral  |
| snowflake                        | 8  | miscellaneous     | neutral  |
| steaming bowl                    | 8  | miscellaneous     | neutral  |
| stop sign                        | 8  | miscellaneous     | negative |
| sunrise                          | 8  | miscellaneous     | neutral  |
| writing hand                     | 8  | miscellaneous     | neutral  |
| airplane                         | 7  | miscellaneous     | neutral  |
| bird                             | 7  | animal            | neutral  |
| candle                           | 7  | miscellaneous     | neutral  |
| fish                             | 7  | animal            | neutral  |
| hear-no-evil monkey              | 7  | miscellaneous     | negative |
| high voltage                     | 7  | miscellaneous     | neutral  |
| last quarter moon with face      | 7  | miscellaneous     | neutral  |
| monkey face                      | 7  | animal            | neutral  |
| neutral face                     | 7  | shock             | negative |
| new moon face                    | 7  | miscellaneous     | neutral  |

|                                  |   |                   |          |
|----------------------------------|---|-------------------|----------|
| nose                             | 7 | miscellaneous     | neutral  |
| pistol                           | 7 | miscellaneous     | neutral  |
| post office                      | 7 | miscellaneous     | neutral  |
| raised hand with fingers splayed | 7 | miscellaneous     | neutral  |
| shamrock                         | 7 | miscellaneous     | neutral  |
| speaking head                    | 7 | miscellaneous     | neutral  |
| tiger face                       | 7 | animal            | neutral  |
| tornado                          | 7 | miscellaneous     | neutral  |
| tropical drink                   | 7 | miscellaneous     | neutral  |
| woman dancing                    | 7 | miscellaneous     | positive |
| worried face                     | 7 | sad               | negative |
| beach with umbrella              | 6 | miscellaneous     | neutral  |
| cactus                           | 6 | miscellaneous     | neutral  |
| chequered flag                   | 6 | miscellaneous     | neutral  |
| disappointed but relieved face   | 6 | sad               | negative |
| dog                              | 6 | animal            | neutral  |
| eight-spoked asterisk            | 6 | miscellaneous     | neutral  |
| house with garden                | 6 | miscellaneous     | neutral  |
| loudspeaker                      | 6 | miscellaneous     | neutral  |
| mushroom                         | 6 | miscellaneous     | neutral  |
| pizza                            | 6 | miscellaneous     | neutral  |
| pouting face                     | 6 | anger             | negative |
| teacup without handle            | 6 | miscellaneous     | neutral  |
| tired face                       | 6 | anger             | negative |
| tropical fish                    | 6 | miscellaneous     | neutral  |
| bell                             | 5 | miscellaneous     | neutral  |
| brazil                           | 5 | geographic region | neutral  |
| bright button                    | 5 | miscellaneous     | neutral  |
| burrito                          | 5 | miscellaneous     | neutral  |
| cookie                           | 5 | miscellaneous     | neutral  |
| cooking                          | 5 | miscellaneous     | neutral  |
| cool button                      | 5 | miscellaneous     | neutral  |
| dango                            | 5 | miscellaneous     | neutral  |
| dog face                         | 5 | animal            | neutral  |
| double exclamation mark          | 5 | shock             | neutral  |
| eight-pointed star               | 5 | miscellaneous     | neutral  |
| french fries                     | 5 | miscellaneous     | neutral  |
| goat                             | 5 | animal            | neutral  |
| heavy check mark                 | 5 | miscellaneous     | neutral  |
| lipstick                         | 5 | miscellaneous     | neutral  |

|                             |   |                   |          |
|-----------------------------|---|-------------------|----------|
| locked with key             | 5 | miscellaneous     | neutral  |
| mobile phone                | 5 | miscellaneous     | neutral  |
| mobile phone off            | 5 | miscellaneous     | neutral  |
| mosque                      | 5 | geographic region | neutral  |
| nerd face                   | 5 | happy             | positive |
| person tipping hand         | 5 | happy             | positive |
| shaved ice                  | 5 | miscellaneous     | neutral  |
| soft ice cream              | 5 | miscellaneous     | neutral  |
| sport utility vehicle       | 5 | miscellaneous     | neutral  |
| strawberry                  | 5 | miscellaneous     | neutral  |
| sweat droplets              | 5 | miscellaneous     | neutral  |
| unicorn face                | 5 | animal            | neutral  |
| weary cat face              | 5 | sad               | negative |
| woman                       | 5 | miscellaneous     | neutral  |
| books                       | 4 | miscellaneous     | neutral  |
| cloud with snow             | 4 | miscellaneous     | neutral  |
| collision                   | 4 | miscellaneous     | neutral  |
| cooked rice                 | 4 | miscellaneous     | neutral  |
| droplet                     | 4 | miscellaneous     | neutral  |
| face with head-bandage      | 4 | sad               | negative |
| fork and knife              | 4 | miscellaneous     | neutral  |
| fork and knife with plate   | 4 | miscellaneous     | neutral  |
| headphone                   | 4 | miscellaneous     | neutral  |
| hourglass with flowing sand | 4 | miscellaneous     | neutral  |
| ice cream                   | 4 | miscellaneous     | neutral  |
| lemon                       | 4 | miscellaneous     | neutral  |
| lollipop                    | 4 | miscellaneous     | neutral  |
| nail polish                 | 4 | miscellaneous     | neutral  |
| o button (blood type)       | 4 | miscellaneous     | neutral  |
| pill                        | 4 | miscellaneous     | neutral  |
| potato                      | 4 | miscellaneous     | neutral  |
| shallow pan of food         | 4 | miscellaneous     | neutral  |
| shortcake                   | 4 | miscellaneous     | neutral  |
| snowman without snow        | 4 | miscellaneous     | neutral  |
| stuffed flatbread           | 4 | miscellaneous     | neutral  |
| sun behind cloud            | 4 | miscellaneous     | negative |
| tiger                       | 4 | animal            | neutral  |
| two women holding hands     | 4 | miscellaneous     | neutral  |
| watermelon                  | 4 | miscellaneous     | neutral  |



|                             |   |                   |          |
|-----------------------------|---|-------------------|----------|
| afghanistan                 | 3 | geographic region | neutral  |
| artist palette              | 3 | miscellaneous     | neutral  |
| bento box                   | 3 | miscellaneous     | neutral  |
| bomb                        | 3 | miscellaneous     | neutral  |
| call me hand                | 3 | miscellaneous     | neutral  |
| cheese wedge                | 3 | miscellaneous     | neutral  |
| cityscape at dusk           | 3 | miscellaneous     | neutral  |
| curry rice                  | 3 | miscellaneous     | neutral  |
| dashing away                | 3 | miscellaneous     | neutral  |
| desert island               | 3 | miscellaneous     | neutral  |
| doughnut                    | 3 | miscellaneous     | neutral  |
| face with cold sweat        | 3 | sad               | neutral  |
| face with medical mask      | 3 | sad               | negative |
| fallen leaf                 | 3 | miscellaneous     | neutral  |
| family                      | 3 | miscellaneous     | neutral  |
| frog face                   | 3 | animal            | neutral  |
| front-facing baby chick     | 3 | miscellaneous     | neutral  |
| frowning face               | 3 | anger             | negative |
| hamburger                   | 3 | miscellaneous     | neutral  |
| handshake                   | 3 | miscellaneous     | neutral  |
| horse racing                | 3 | animal            | neutral  |
| hot pepper                  | 3 | miscellaneous     | neutral  |
| kuwait                      | 3 | geographic region | neutral  |
| light bulb                  | 3 | miscellaneous     | neutral  |
| man and woman holding hands | 3 | miscellaneous     | neutral  |
| meat on bone                | 3 | miscellaneous     | neutral  |
| microphone                  | 3 | miscellaneous     | neutral  |
| money-mouth face            | 3 | miscellaneous     | neutral  |
| no mobile phones            | 3 | miscellaneous     | neutral  |
| oden                        | 3 | miscellaneous     | neutral  |
| pencil                      | 3 | miscellaneous     | neutral  |
| person bouncing ball        | 3 | miscellaneous     | neutral  |
| person playing handball     | 3 | miscellaneous     | neutral  |
| popcorn                     | 3 | miscellaneous     | neutral  |
| pot of food                 | 3 | miscellaneous     | neutral  |
| poultry leg                 | 3 | miscellaneous     | neutral  |
| princess                    | 3 | miscellaneous     | neutral  |
| ribbon                      | 3 | miscellaneous     | neutral  |
| seedling                    | 3 | miscellaneous     | neutral  |

|                               |   |                   |          |
|-------------------------------|---|-------------------|----------|
| sleepy face                   | 3 | sad               | negative |
| slightly frowning face        | 3 | anger             | negative |
| slot machine                  | 3 | miscellaneous     | neutral  |
| spaghetti                     | 3 | miscellaneous     | neutral  |
| sun behind small cloud        | 3 | miscellaneous     | neutral  |
| taco                          | 3 | miscellaneous     | neutral  |
| top hat                       | 3 | miscellaneous     | neutral  |
| two men holding hands         | 3 | miscellaneous     | neutral  |
| violin                        | 3 | miscellaneous     | neutral  |
| ant                           | 2 | animal            | neutral  |
| automobile                    | 2 | miscellaneous     | neutral  |
| avocado                       | 2 | miscellaneous     | neutral  |
| banana                        | 2 | miscellaneous     | neutral  |
| bed                           | 2 | miscellaneous     | neutral  |
| black circle                  | 2 | miscellaneous     | neutral  |
| boxing glove                  | 2 | miscellaneous     | neutral  |
| bread                         | 2 | miscellaneous     | neutral  |
| chart increasing              | 2 | miscellaneous     | neutral  |
| cloud with lightning and rain | 2 | miscellaneous     | neutral  |
| colombia                      | 2 | geographic region | neutral  |
| comet                         | 2 | miscellaneous     | neutral  |
| cowboy hat face               | 2 | happy             | positive |
| croissant                     | 2 | miscellaneous     | neutral  |
| crossed fingers               | 2 | miscellaneous     | neutral  |
| custard                       | 2 | miscellaneous     | neutral  |
| door                          | 2 | miscellaneous     | neutral  |
| drum                          | 2 | miscellaneous     | neutral  |
| exclamation question mark     | 2 | miscellaneous     | neutral  |
| eye                           | 2 | miscellaneous     | neutral  |
| fried shrimp                  | 2 | miscellaneous     | neutral  |
| grapes                        | 2 | miscellaneous     | neutral  |
| hammer                        | 2 | miscellaneous     | neutral  |
| hot dog                       | 2 | miscellaneous     | neutral  |
| house                         | 2 | miscellaneous     | neutral  |
| india                         | 2 | geographic region | neutral  |
| italy                         | 2 | geographic region | neutral  |
| japan                         | 2 | geographic region | neutral  |

|                                   |   |                   |          |
|-----------------------------------|---|-------------------|----------|
| kaaba                             | 2 | geographic region | neutral  |
| kissing cat face with closed eyes | 2 | love              | positive |
| laptop computer                   | 2 | miscellaneous     | neutral  |
| left-pointing magnifying glass    | 2 | miscellaneous     | neutral  |
| man swimming                      | 2 | miscellaneous     | neutral  |
| middle finger                     | 2 | miscellaneous     | negative |
| musical keyboard                  | 2 | miscellaneous     | neutral  |
| national park                     | 2 | miscellaneous     | neutral  |
| no entry                          | 2 | miscellaneous     | negative |
| page with curl                    | 2 | miscellaneous     | neutral  |
| pancakes                          | 2 | miscellaneous     | neutral  |
| pear                              | 2 | miscellaneous     | neutral  |
| people with bunny ears partying   | 2 | miscellaneous     | positive |
| prince                            | 2 | miscellaneous     | neutral  |
| radio button                      | 2 | miscellaneous     | neutral  |
| ring                              | 2 | miscellaneous     | neutral  |
| rooster                           | 2 | miscellaneous     | neutral  |
| santa claus                       | 2 | miscellaneous     | neutral  |
| saudi arabia                      | 2 | geographic region | neutral  |
| small airplane                    | 2 | miscellaneous     | neutral  |
| small blue diamond                | 2 | miscellaneous     | neutral  |
| smiling face with horns           | 2 | anger             | negative |
| sneezing face                     | 2 | anger             | negative |
| sun behind large cloud            | 2 | miscellaneous     | neutral  |
| tangerine                         | 2 | miscellaneous     | neutral  |
| television                        | 2 | miscellaneous     | neutral  |
| thumbs down                       | 2 | miscellaneous     | negative |
| tunisia                           | 2 | geographic region | neutral  |
| turkey                            | 2 | geographic region | neutral  |
| two-hump camel                    | 2 | animal            | neutral  |
| volleyball                        | 2 | miscellaneous     | neutral  |
| vulcan salute                     | 2 | miscellaneous     | neutral  |
| waning crescent moon              | 2 | miscellaneous     | neutral  |
| watch                             | 2 | miscellaneous     | neutral  |
| white heavy check mark            | 2 | miscellaneous     | neutral  |
| wolf face                         | 2 | animal            | neutral  |
| woman facepalming                 | 2 | miscellaneous     | negative |

|                             |   |                   |          |
|-----------------------------|---|-------------------|----------|
| zipper-mouth face           | 2 | miscellaneous     | negative |
| 1st place medal             | 1 | miscellaneous     | positive |
| airplane departure          | 1 | miscellaneous     | neutral  |
| alien                       | 1 | miscellaneous     | neutral  |
| anchor                      | 1 | miscellaneous     | neutral  |
| anguilla                    | 1 | geographic region | neutral  |
| anticlockwise arrows button | 1 | miscellaneous     | neutral  |
| back arrow                  | 1 | miscellaneous     | neutral  |
| baguette bread              | 1 | miscellaneous     | neutral  |
| basketball                  | 1 | miscellaneous     | neutral  |
| bear face                   | 1 | animal            | neutral  |
| bikini                      | 1 | miscellaneous     | neutral  |
| blond-haired woman          | 1 | miscellaneous     | neutral  |
| bow and arrow               | 1 | miscellaneous     | neutral  |
| bride with veil             | 1 | miscellaneous     | neutral  |
| bug                         | 1 | miscellaneous     | neutral  |
| bus                         | 1 | miscellaneous     | neutral  |
| bust in silhouette          | 1 | miscellaneous     | neutral  |
| busts in silhouette         | 1 | miscellaneous     | neutral  |
| carousel horse              | 1 | miscellaneous     | neutral  |
| carrot                      | 1 | miscellaneous     | neutral  |
| cat                         | 1 | animal            | neutral  |
| chestnut                    | 1 | miscellaneous     | neutral  |
| chipmunk                    | 1 | animal            | neutral  |
| church                      | 1 | miscellaneous     | neutral  |
| clapper board               | 1 | miscellaneous     | neutral  |
| classical building          | 1 | miscellaneous     | neutral  |
| cloud with lightning        | 1 | miscellaneous     | neutral  |
| clown face                  | 1 | happy             | positive |
| cocktail glass              | 1 | miscellaneous     | neutral  |
| construction                | 1 | miscellaneous     | neutral  |
| cow                         | 1 | animal            | neutral  |
| cow face                    | 1 | animal            | neutral  |
| cross mark button           | 1 | miscellaneous     | negative |
| cyclone                     | 1 | miscellaneous     | neutral  |
| desert                      | 1 | miscellaneous     | neutral  |
| detective                   | 1 | miscellaneous     | neutral  |
| diamond with a dot          | 1 | miscellaneous     | neutral  |
| direct hit                  | 1 | miscellaneous     | neutral  |
| dolphin                     | 1 | animal            | neutral  |

|                                   |   |                   |         |
|-----------------------------------|---|-------------------|---------|
| double curly loop                 | 1 | miscellaneous     | neutral |
| dragon                            | 1 | animal            | neutral |
| ear                               | 1 | miscellaneous     | neutral |
| ear of corn                       | 1 | miscellaneous     | neutral |
| eggplant                          | 1 | miscellaneous     | neutral |
| electric plug                     | 1 | miscellaneous     | neutral |
| envelope                          | 1 | miscellaneous     | neutral |
| europa                            | 1 | geographic region | neutral |
| face with thermometer             | 1 | sad               | neutral |
| film projector                    | 1 | miscellaneous     | neutral |
| flashlight                        | 1 | miscellaneous     | neutral |
| foggy                             | 1 | miscellaneous     | neutral |
| footprints                        | 1 | miscellaneous     | neutral |
| fountain pen                      | 1 | miscellaneous     | neutral |
| france                            | 1 | geographic region | neutral |
| georgia                           | 1 | geographic region | neutral |
| germany                           | 1 | geographic region | neutral |
| glass of milk                     | 1 | miscellaneous     | neutral |
| goal net                          | 1 | miscellaneous     | neutral |
| gorilla                           | 1 | animal            | neutral |
| greece                            | 1 | geographic region | neutral |
| green apple                       | 1 | miscellaneous     | neutral |
| guard                             | 1 | miscellaneous     | neutral |
| hammer and pick                   | 1 | miscellaneous     | neutral |
| hamster face                      | 1 | animal            | neutral |
| hatching chick                    | 1 | animal            | neutral |
| helicopter                        | 1 | miscellaneous     | neutral |
| high-heeled shoe                  | 1 | miscellaneous     | neutral |
| high-speed train with bullet nose | 1 | miscellaneous     | neutral |
| horse face                        | 1 | animal            | neutral |
| hotel                             | 1 | miscellaneous     | neutral |
| hourglass                         | 1 | miscellaneous     | neutral |
| inbox tray                        | 1 | miscellaneous     | neutral |
| jordan                            | 1 | geographic region | neutral |
| left-facing fist                  | 1 | miscellaneous     | neutral |

|                           |   |                   |          |
|---------------------------|---|-------------------|----------|
| left speech bubble        | 1 | miscellaneous     | neutral  |
| libya                     | 1 | geographic region | neutral  |
| linked paperclips         | 1 | miscellaneous     | neutral  |
| man playing handball      | 1 | miscellaneous     | neutral  |
| man running               | 1 | miscellaneous     | neutral  |
| mobile phone with arrow   | 1 | miscellaneous     | neutral  |
| money bag                 | 1 | miscellaneous     | neutral  |
| mountain                  | 1 | miscellaneous     | neutral  |
| nauseated face            | 1 | anger             | negative |
| no one under eighteen     | 1 | miscellaneous     | neutral  |
| oman                      | 1 | geographic region | neutral  |
| oncoming bus              | 1 | miscellaneous     | neutral  |
| outbox tray               | 1 | miscellaneous     | neutral  |
| ox                        | 1 | animal            | neutral  |
| p button                  | 1 | miscellaneous     | neutral  |
| peace symbol              | 1 | miscellaneous     | neutral  |
| peach                     | 1 | miscellaneous     | neutral  |
| people wrestling          | 1 | miscellaneous     | neutral  |
| person frowning           | 1 | anger             | negative |
| person in bed             | 1 | miscellaneous     | neutral  |
| person juggling           | 1 | miscellaneous     | neutral  |
| person lifting weights    | 1 | miscellaneous     | neutral  |
| person playing water polo | 1 | miscellaneous     | neutral  |
| person pouting            | 1 | anger             | negative |
| pile of poo               | 1 | miscellaneous     | negative |
| pineapple                 | 1 | miscellaneous     | neutral  |
| police car light          | 1 | miscellaneous     | neutral  |
| poodle                    | 1 | miscellaneous     | neutral  |
| postbox                   | 1 | miscellaneous     | neutral  |
| question mark             | 1 | miscellaneous     | neutral  |
| rabbit face               | 1 | animal            | neutral  |
| radio                     | 1 | miscellaneous     | neutral  |
| raised back of hand       | 1 | miscellaneous     | neutral  |
| raised fist               | 1 | miscellaneous     | neutral  |
| red triangle pointed up   | 1 | miscellaneous     | neutral  |
| roasted sweet potato      | 1 | miscellaneous     | neutral  |
| rosette                   | 1 | miscellaneous     | neutral  |
| rugby football            | 1 | miscellaneous     | neutral  |
| sake                      | 1 | miscellaneous     | neutral  |

|                        |   |                   |         |
|------------------------|---|-------------------|---------|
| saxophone              | 1 | miscellaneous     | neutral |
| scissors               | 1 | miscellaneous     | neutral |
| scorpius               | 1 | miscellaneous     | neutral |
| scroll                 | 1 | miscellaneous     | neutral |
| seat                   | 1 | miscellaneous     | neutral |
| selfie                 | 1 | miscellaneous     | neutral |
| shield                 | 1 | miscellaneous     | neutral |
| shopping bags          | 1 | miscellaneous     | neutral |
| shower                 | 1 | miscellaneous     | neutral |
| snail                  | 1 | miscellaneous     | neutral |
| snowboarder            | 1 | miscellaneous     | neutral |
| sos button             | 1 | miscellaneous     | neutral |
| speaker high volume    | 1 | miscellaneous     | neutral |
| speaker low volume     | 1 | miscellaneous     | neutral |
| spider                 | 1 | miscellaneous     | neutral |
| star and crescent      | 1 | miscellaneous     | neutral |
| studio microphone      | 1 | miscellaneous     | neutral |
| sushi                  | 1 | miscellaneous     | neutral |
| syringe                | 1 | miscellaneous     | neutral |
| thailand               | 1 | geographic region | neutral |
| three-thirty           | 1 | miscellaneous     | neutral |
| timer clock            | 1 | miscellaneous     | neutral |
| tokyo tower            | 1 | miscellaneous     | neutral |
| tomato                 | 1 | miscellaneous     | neutral |
| tongue                 | 1 | miscellaneous     | neutral |
| umbrella               | 1 | miscellaneous     | neutral |
| united kingdom         | 1 | geographic region | neutral |
| video camera           | 1 | miscellaneous     | neutral |
| virgo                  | 1 | miscellaneous     | neutral |
| white circle           | 1 | miscellaneous     | neutral |
| white flower           | 1 | miscellaneous     | neutral |
| woman biking           | 1 | miscellaneous     | neutral |
| woman lifting weights  | 1 | miscellaneous     | neutral |
| woman playing handball | 1 | miscellaneous     | neutral |
| woman swimming         | 1 | m                 | neutral |
| women wrestling        | 1 | m                 | neutral |





Table S2. Relationships between social media platform posts and variables of interests and excluding a highly active individual on social media. Values marked with an asterisk indicate  $n < 5$ .

|                 | Instagram® |      | Non-Instagram® |      | Total<br>n | p value |
|-----------------|------------|------|----------------|------|------------|---------|
|                 | n          | %    | n              | %    |            |         |
| <b>Region</b>   |            |      |                |      |            | <0.001  |
| <b>UAE</b>      | 51         | 66.2 | 12             | 27.3 | 63         |         |
| <b>Non-UAE</b>  | 26         | 33.8 | 32             | 72.7 | 58         |         |
| <b>Gender*</b>  |            |      |                |      |            | 0.012   |
| <b>Male</b>     | 55         | 71.4 | 40             | 90.9 | 95         |         |
| <b>Female</b>   | 22         | 28.6 | 4              | 9.1  | 26         |         |
| <b>Species*</b> |            |      |                |      |            | 0.010   |
| <b>Mammals</b>  | 26         | 33.8 | 4              | 9.1  | 30         |         |
| <b>Primates</b> | 2          | 2.6  | 1              | 2.3  | 3          |         |
| <b>Birds</b>    | 49         | 63.6 | 39             | 88.6 | 88         |         |

Table S3. Relationship of exotic animal species posts and variables of interest. Asterisked variables show that n<5.

|                        | Species |      |          |   |          |       |       |       | Total<br>n | p value |
|------------------------|---------|------|----------|---|----------|-------|-------|-------|------------|---------|
|                        | Mammals |      | Reptiles |   | Primates |       | Birds |       |            |         |
|                        | n       | %    | n        | % | n        | %     | n     | %     |            |         |
| <b>Region*</b>         |         |      |          |   |          |       |       |       |            | <0.001  |
| <b>UAE</b>             | 28      | 93.3 | -        | - | 3        | 100.0 | 32    | 36.4  | 63         |         |
| <b>Non-UAE</b>         | 2       | 6.7  | -        | - | -        | -     | 56    | 63.6  | 58         |         |
| <b>Gender*</b>         |         |      |          |   |          |       |       |       |            | <0.001  |
| <b>Male</b>            | 17      | 56.7 | -        | - | 1        | 33.3  | 77    | 87.5  | 95         |         |
| <b>Female</b>          | 13      | 43.3 | -        | - | 2        | 66.7  | 11    | 12.5  | 26         |         |
| <b>Animal<br/>age*</b> |         |      |          |   |          |       |       |       |            | <0.001  |
| <b>Juvenile</b>        | 6       | 20.0 | -        | - | -        | -     | -     | -     | 6          |         |
| <b>Adult</b>           | 24      | 80.0 | -        | - | 3        | 100.0 | 88    | 100.0 | 115        |         |
| <b>Media<br/>form*</b> |         |      |          |   |          |       |       |       |            | 0.008   |
| <b>Image</b>           | 28      | 93.3 | -        | - | 1        | 33.3  | 78    | 88.6  | 107        |         |
| <b>Video</b>           | 2       | 6.7  | -        | - | 2        | 66.7  | 10    | 11.4  | 14         |         |

Table S4. Relationship between animal age and region. Region is asterisked to indicate than n<5.

|                | Juvenile |       | Adult |      | Total<br>n | p value |
|----------------|----------|-------|-------|------|------------|---------|
|                | n        | %     | n     | %    |            |         |
| <b>Region*</b> |          |       |       |      |            | 0.016   |
| <b>UAE</b>     | 6        | 100.0 | 57    | 49.6 | 63         |         |
| <b>Non-UAE</b> | -        | -     | 58    | 50.4 | 58         |         |
